# Supplementary material
Source: publisher site journal article supplement (http://www.degruyter.com/publication/journal_key/JBR/downloadAsset/JBR_JBR_Style_Sheet.pdf)
Supplement: Supplementary file 1 [file JBR_JBR_Style_Sheet.pdf]

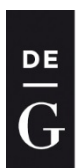

DE GRUYTER

# Theology & Religious Studies

---

De Gruyter— Berlin, Germany & Boston, USA

## **Guidelines for authors and editors preparing document files to be submitted for *Journal of the Bible and Its Reception***

### **Contents**

|                                              |    |
|----------------------------------------------|----|
| 1. GENERAL .....                             | 2  |
| 2. OBTAINING PERMISSIONS .....               | 2  |
| 3. TECHNICAL ISSUES.....                     | 2  |
| 4. STANDARDIZATION.....                      | 2  |
| 5. TITLES AND HEADINGS.....                  | 3  |
| 6. PARAGRAPHS .....                          | 3  |
| 7. QUOTATIONS .....                          | 3  |
| 8. CITATIONS AND REFERENCES.....             | 3  |
| 9. TYPEFACE, EMPHASIS, AND PUNCTUATION ..... | 7  |
| 10. TABLES, FIGURES, AND ILLUSTRATIONS ..... | 7  |
| 11. NOTES .....                              | 7  |
| 12. ADDITIONAL INFORMATION.....              | 8  |
| A. QUOTATIONS FROM THE BIBLE.....            | 8  |
| B. FOREIGN LANGUAGES .....                   | 8  |
| C. ILLUSTRATIONS .....                       | 9  |
| D. ABBREVIATIONS .....                       | 9  |
| E. JBR SPELLINGS AND CAPITALIZATIONS.....    | 17 |
| 13. Questions?.....                          | 23 |

## 1. GENERAL

- All document files will be converted to a format suited to processing in a typesetting system. Accordingly, there is no need for extensive formatting on the part of the author or editor. In particular, there is no need to define or adjust any of the following features:
  - type area, fonts, and type sizes
  - page numbering and running heads
  - headings, paragraphing, and line spacing
  - indentation of quotations, tables, figures, etc.
- Once you have edited your manuscript and prepared your files in accordance with these guidelines, please send us the final edited version of the files as an email attachment.

## 2. OBTAINING PERMISSIONS

- It is the author's responsibility to request any permission required for the use of material owned by others.
- When all permissions have been received, the author should send them, or copies of them, to the managing editors of *JBR*, who will note, or comply with, any special provisions regarding credit lines contained in them.

## 3. TECHNICAL ISSUES

- All major word processors (Mac and/or PC) are acceptable. Authors using less well-known programs should contact the publisher beforehand and/or submit a sample file, preferably both in the respective native format and in Rich Text Format (RTF). In almost all cases it will be possible to convert the files but this has to be checked prior to submission of the final document file.
- For non-Latin fonts (Hebrew, Greek, Coptic, etc.) please use Unicode-compatible fonts or the relevant fonts from the Society of Biblical Literature.
- If non-Latin fonts are used, please enclose them with your manuscript.
- Graphics may be submitted in all major graphic file formats, e.g., T I F F, E P S, etc. Please contact the publisher if you are in doubt whether a particular format will be acceptable. Please note that it is difficult to edit eps-files. Occasionally, graphic files will have to be reprocessed; it is therefore preferable if all graphic files are submitted in a format amenable to further editing. Certain custom-written applications for the visualization of, for instance, statistical data use proprietary file formats and lack filters for the export of files into common file formats. The processing of data generated with such applications is not possible without the respective applications themselves. In such (rare) cases you are asked to contact the publisher beforehand (cf. section 2, *Obtaining permissions*, if you make use of copy- righted graphics).

## 4. STANDARDIZATION

- Items to be checked for consistency throughout the article include italicizing of words, placement of footnote numbers in the text, spaces or lack of spaces at either side of dashes, etc. With regard to individual questions of grammar and punctuation, please adhere to the Chicago Manual of Style:  
<http://www.chicagomanualofstyle.org/home.html>

- Either standard British or American English spelling may be used, but should be consistent throughout the article. Wherever possible, American spelling is preferred.

## 5. TITLES AND HEADINGS

- The text should be divided into sections and, if necessary, subsections, with appropriate headings.
- All headings begin flush left.
- For all headings in the article, please do not use generic codes but the following numbering system:
  - 1. Main heading
  - 1.1. Section heading
  - 1.1.1. Subsection heading
- Do not end a title or heading with a period when it is to appear on a line separate from the text.
- Please use headline style (e.g., capitalize all letters in a title apart from articles and prepositions) for all titles and headings.

## 6. PARAGRAPHS

- All paragraphs should start with a tabulator (→).
- There is no need to set the tab to a particular position.

## 7. QUOTATIONS

- Short quotations (fewer than 60 words) should be run on (i.e., included within the text) and should be enclosed in double quotation marks. Single quotation should only be used to enclose quotations within quotations.
- Longer quotations should appear as a block, separated from the text by at least two carriage returns (¶¶). They are not to be enclosed within quotation marks.
- All quotations should follow the original text exactly in wording, spelling, and punctuation. Any additions by the author should be indicated by square brackets. Indicate omissions by ellipsis points within brackets.
- All quotations in languages other than English are to be followed by the translation in square brackets.

## 8. CITATIONS AND REFERENCES

- Reference style may be either footnote referencing (see 8.1 below) OR author-date citation (see 8.3 below), but please be consistent in your choice and use only one style or the other.
- Footnotes are to be numbered consecutively using Arabic numerals. The footnote number is generally placed after the final punctuation mark: (...for example.<sup>1</sup>) and/or outside quotation marks (...for example."<sup>1</sup>) (...for example"<sup>1</sup> in the middle of a sentence.)
- Whenever possible, give the full first names of authors and editors.
- Give the full title and subtitle of each work.
- Give both the place of publication and the publisher.
- Use the full names of journals, book series, publishers, and conferences in the first occurrence, with abbreviations following the full name in parentheses, e.g.,

Society of Biblical Literature (SBL). Thereafter you may use the abbreviation by itself.

- Titles of published books and journals are capitalized and italicized; unpublished works, such as Ph.D. dissertations, and the titles of articles in journals or edited works are neither capitalized nor italicized (see examples below).
- Give the inclusive page numbers of articles in journals or edited works.
- Unless otherwise noted, do not use “et al.” but give all names.

### 8.1 Footnote Formatting Examples (CMS 16.10, 16.19–16.70 + 17)

#### **Book:**

<sup>1</sup> Kurt Nowak, *Schleiermacher: Leben, Werk und Wirkung* (Göttingen: Vandenhoeck & Ruprecht, 2001), 447.

#### **Translated book:**

<sup>1</sup> Friedrich Schleiermacher, *On Religion: Speeches to its Cultured Despisers*, trans. Richard Crouter (Cambridge: Cambridge University Press, 1988), 89–91.

#### **Edited book:**

<sup>1</sup> Andreas Arndt and Wolfgang Virmond, eds., *Friedrich Schleiermacher zum 150. Todestag: Handschriften und Drucke* (Berlin: Walter de Gruyter, 1984), 62.

#### **Multivolume book:**

<sup>1</sup> Ernst Troeltsch, *Zur religiösen Lage, Religionsphilosophie und Ethik*, vol. 2, *Gesammelte Schriften* (Tübingen: J.C.B. Mohr, 1913), 566–69.

#### **Book in a series:**

<sup>1</sup> Hans Joachim Birkner, *Schleiermacher-Studien*, Schleiermacher-Archiv 16 (Berlin: Walter de Gruyter, 1996).

#### **Article in edited book:**

<sup>1</sup> Clifford Geertz, “Religion as a Cultural System,” In *Anthropological Approaches to the Study of Religion*, ed. Michael Banton (London: Tavistock, 1966): 1–16.

#### **Article in journal:**

<sup>1</sup> Timothy Fitzgerald, “Religion, Philosophy and Family Resemblance,” *Religion* 26 (1996): 215–36.

#### **Book published electronically:**

<sup>1</sup> Jane Austen, *Pride and Prejudice* (New York: Penguin Classics, 2007), Kindle edition.

<sup>2</sup> Philip B. Kurland and Ralph Lerner, eds., *The Founders’ Constitution* (Chicago: University of Chicago Press, 1987), accessed February 28, 2010, <http://press-pubs.uchicago.edu/founders/>.

<sup>3</sup> Austen, *Pride and Prejudice*.

<sup>4</sup> Kurland and Lerner, *Founder’s Constitution*, chap. 10, doc. 19.

#### **E-mail or text message:**

<sup>1</sup> John Doe, e-mail message to author, February 28, 2010.

**Website:**

<sup>1</sup> “Google Privacy Policy,” last modified March 11, 2009,  
<http://www.google.com/intl/en/privacypolicy.html>.

<sup>2</sup> “McDonald’s Happy Meal Toy Safety Facts,” McDonald’s Corporation, accessed July 19, 2008, <http://www.mcdonalds.com/corp/about/factsheets.html>.

<sup>3</sup> “Google Privacy Policy.”

<sup>4</sup> “Toy Safety Facts.”

**Blog entry or comment:**

<sup>1</sup> Jack, February 25, 2010 (7:03 p.m.), comment on Richard Posner, “Double Exports in Five Years?,” *The Becker-Posner Blog*, February 21, 2010, <http://uchicagolaw.typepad.com/beckerposner/2010/02/double-exports-in-five-years-posner.html>.

<sup>2</sup> Jack, comment on Posner, “Double Exports.”

*8.2 Bibliography Formatting Examples (CMS 16.10, 16.71–89 + 17)***Book:**

Nowak, Kurt. *Schleiermacher: Leben, Werk und Wirkung*. Göttingen: Vandenhoeck & Ruprecht, 2001.

**Translated book:**

Schleiermacher, Friedrich. *On Religion: Speeches to its Cultured Despisers*, trans. Richard Crouter. Cambridge: Cambridge University Press, 1988.

**Edited book:**

Arndt, Andreas, and Wolfgang Virmond, eds. *Friedrich Schleiermacher zum 150. Todestag: Handschriften und Drucke*. Berlin: Walter de Gruyter, 1984.

**Multivolume book:**

Troeltsch, Ernst. *Zur religiösen Lage, Religionsphilosophie und Ethik*, vol. 2, *Gesammelte Schriften*. Tübingen: J.C.B. Mohr, 1913.

**Book in a series:**

Birkner, Hans Joachim. *Schleiermacher-Studien*. Schleiermacher-Archiv 16. Berlin: Walter de Gruyter, 1996.

**Several entries of same author:**

Waardenburg, Jacques. *Islam*. Religion and Reason 40. Berlin: Walter de Gruyter, 2002.

———, *Muslims as Actors*. Religion and Reason 46. Berlin: Walter de Gruyter, 2007.

**Article in edited book:**

Geertz, Clifford. “Religion as a Cultural System,” in *Anthropological Approaches to the Study of Religion*, ed. Michael Banton, 1–16. London: Tavistock, 1966.

**Article in journal:**

Fitzgerald, Timothy. “Religion, Philosophy and Family Resemblance.” *Religion* 26 (1996): 215–36.

**Book published electronically:**

Austen, Jane. *Pride and Prejudice*. New York: Penguin Classics, 2007. Kindle edition.

Kurland, Philip B., and Ralph Lerner, eds. *The Founders' Constitution*. Chicago: University of Chicago Press, 1987. Accessed February 28, 2010. <http://press-pubs.uchicago.edu/founders/>.

**Blog entry or comment:**

*Becker-Posner Blog, The*. <http://uchicagolaw.typepad.com/beckerposner/>.

**Item in a commercial database:**

Choi, Mihwa. "Contesting *Imaginaires* in Death Rituals during the Northern Song Dynasty." PhD diss., University of Chicago, 2008. ProQuest (AAT 3300426).

*8.3 Alternatively: Author-Date System (CMS 16.90–120)***Book in text:**

"... (Nowak 2001, 34)" or "as Nowak (2001, 35) ..."

(Bouissac 1985)

one author

(Smith and Jones 1995)

two authors

(Uexküll, Geigges, and Host 1993)

three authors

(Smith et al. 1990: 38)

four or more authors (but give all the authors in the reference entry)

(Bouissac 1987a, 1987b, 1994)

works by one author

(Bouissac 1985; Deakin 1993)

works by different authors

(Hockett 1964: 140–145)

no dropped digits in inclusive numbers

(Balat and Dove 1992, 1: 210)

volume number

(Dickens [1854] 1987: 73)

reprints: with original date at first mention; in all subsequent citations (Dickens 1987: 73)

**Book in bibliography:**

Nowak, Kurt. 2001. *Schleiermacher: Leben, Werk und Wirkung*. Göttingen: Vandenhoeck & Ruprecht.

**Edited book in text:**

"... (Arndt and Virmond 1984, 21)"

**Edited book in bibliography:**

Arndt, Andreas, and Wolfgang Virmond, eds., 1984. *Friedrich Schleiermacher zum 150. Todestag: Handschriften und Drucke*. Berlin: Walter de Gruyter.

**Journal in text:**

"... (Glomsrud 2009, 39)"

**Journal in bibliography:**

Glomsrud, Ryan. 2009. "The Cat-Eyed Theologians: Franz Overbeck and Karl Barth." *Journal for the History of Modern Theology* 16:37–57.

**Several entries of same author:**

Waardenburg, Jacques. 2002. *Islam*. Religion and Reason 40. Berlin: Walter de Gruyter.

———. 2007. *Muslims as Actors*. Religion and Reason 46. Berlin: Walter de Gruyter.

#### 8.4 Other Citation Details

- Provide a works cited list at the end of the article.
- Give page numbers in full: do not use “f.”, “ff.”.
- Avoid referring to a whole book: give exact page numbers whenever possible.
- Always give the page number with quotations.
- Always give the full author-date citation: do not use “op. cit.”, “loc. cit.” or “ibid.”.

### 9. TYPEFACE, EMPHASIS, AND PUNCTUATION

- Italics should be used for:
  - foreign-language expressions (single or double quotation marks should not be used);
  - the titles of books, published documents, newspapers, and periodicals.
- Italics may be used to:
  - draw attention to significant terms at first mention only;
  - emphasize a word or phrase in a quotation, if so indicated “[emphasis mine]”.
- Please do not use any other kind of emphasis; italics, boldface type, underlining or capital letters used for emphasis are undesirable.
- Double quotation marks should be used in all cases unless otherwise noted.
- Use rounded quotation marks (“...”) not “straight” ones.
- Do not use double round brackets: brackets within parentheses should be square brackets.
- Full stops/periods should be placed within quotation marks.
- Parenthetical dashes are longer than hyphens. If you cannot print dashes, use double hyphens.
- An “en”-dash, “–”, is used to indicate continuing or inclusive numbers, such as “1965–1966”, or pages “5–8”. If your word processor has no en- dash, use two hyphens characters.

### 10. TABLES, FIGURES, AND ILLUSTRATIONS

- Tables and figures should be numbered consecutively throughout the article and be given short titles. The title of a table should appear above the table, the title of a figure below the figure.
- If there are figures to be included, please send the originals, not scanned versions.
- If photographs are to be inserted from hard copy rather than digital, good quality prints and, when in doubt, the negatives or slides should be provided.

### 11. NOTES

- Notes should be numbered consecutively throughout the text and placed at the bottom of each page.
- Note numbers in the text should be superscript (small raised) numbers without parentheses.
- The note number should directly follow the word in question or a punctuation mark if applicable, with no blank space.

## 12. ADDITIONAL INFORMATION

### A. QUOTATIONS FROM THE BIBLE

- English quotations from the Bible should follow the New Revised Standard Version (NRSV). If an author presents a different translation, this should be indicated in parentheses.
- Abbreviations for modern versions of the Bible can be found in SBL Handbook of Style.
  - Sample a: “Early in the morning Laban rose up, and kissed his grandchildren and his daughters” (Gen 31:55).
  - Sample b: “And early in the morning Laban rose up, and kissed his sons and his daughters” (Gen 31:55 [KJV]).
- Chapter and verse numbering from the Bible should follow the New Revised Standard Version (NRSV). If an author uses different numbering (e.g., following the Masoretic Text [MT]), this should be indicated in parentheses. Where possible, the equivalent NRSV numbering should be indicated first, with the MT numbering in parentheses. Relevant abbreviations (MT, LXX, etc.) can be found in below or in the SBL Handbook of Style.
  - Sample a: “Early in the morning Laban rose up, and kissed his grandchildren and his daughters” (Gen 31:55).
  - Sample b: “Early in the morning Laban rose up, and kissed his grandchildren and his daughters” (Gen 32:1 [MT]).
  - Sample c: “Early in the morning Laban rose up, and kissed his grandchildren and his daughters” (Gen 31:55 [MT 32:1]).
  - Sample d: So, as we can see from Gen 31:55, ...
  - Sample e: So, as we can see from Gen 32:1 (MT), ...
  - Sample f: So, as we can see from Gen 31:55 (MT 32:1), ...
- Etymology (in either Hebrew transliteration or Greek characters) should likewise indicate “MT” for Masoretic Text or “LXX” for Septuagint. Where the Hebrew or Greek is not actually attested in the MT or LXX, “Heb.” or “Gk.” should be used instead.
  - Sample: So, for example, Adamah (MT ’Ādāmā; LXX Αδάμι) ...
- Note that the first letter of Hebrew transliterated proper names should be capitalized (e.g., ’Ādāmā [not ’ādāmā]), and the first letter of Greek proper names should likewise be capitalized, though without spiritus or accent (e.g., Αβιδαν [not Ἀβιδαν, Ἀβιδαν or Ἀβιδαν]).
- For further details on transliteration, please see the Transliteration Guidelines below.

### B. FOREIGN LANGUAGES

- Please use a Unicode compatible font for Greek and Hebrew text, as well as for text in transliteration.
- Quotations in a foreign language should always be accompanied by an English translation, either in a footnotes or in brackets [ ].
- Latin quotations should not appear in italics (though individual terms and concepts may still appear in italics).
- The following should be given in transliteration (in italics):
  - Aramaic, Arabic, Akkadian, Armenian, Coptic, Egyptian, Elamite, Ethiopic, Hittite, Hurrian, Iranian, Persian, Phoenician, Sumerian, Syriac, and Ugaritic

### C. ILLUSTRATIONS

- Both black-and-white and full-color images can be included in journal articles. Contributors are encouraged to make use of images only in cases where they are necessary to advance the argument of the article.
- Contributors wishing to make use of the full-color plates are requested to discuss the matter with the managing editors as soon as possible.
- Contributors must either (i) assure the editorial office that they hold the rights to the images or (ii) certify that they are in public domain.
- All necessary permissions must be obtained by the contributor, and any fees associated with obtaining permissions must be paid by the contributor.
- Contributors must also provide a reproducible copy of the material, with a suitable resolution for printing (minimum 300 dpi); any exceptions must be discussed with the managing editors at the time of submission of the article for review.
- If the author incurs a fee in the process of obtaining an image with a suitable resolution, the Publisher will pay reasonable reproduction fees only in cases where images are an essential part of the argumentation of the article (as above).

### D. ABBREVIATIONS

#### 1. *General Abbreviations*

- Use only the simplest and most common abbreviations (i.e., etc., e.g., et al.).
- No general abbreviations are to be used in the main body of the text (“century,” “for example,” etc. are to be written out in full). Equally, all first names are to be written out in full.
- Do not use periods after acronyms (AAR, not A.A.R.).
- Single references to biblical books are to be abbreviated according to the SBL Handbook of Style, e.g., Jer 20:7.
- Verse numbers within a chapter are separated by a comma without a space (e.g., Mark 12:13–17, 35–37).
- Passages from various chapters and various books are separated with a semicolon with a space (e.g., Num 12:1–15; 20:1–13; Mark 11:27–33; 12:1–12) with the exception of parallel passages (e.g., Matt 6:9–13 par. Luke 11:2–4), as are several chapters without verse numbers (e.g., Jer 5–6; 9).
- In the case of numbered books (e.g., 1Sam or 2Sam) there is no space between the number and the name of the book.

## 2. Technical Abbreviations

|            |                                   |              |                                  |
|------------|-----------------------------------|--------------|----------------------------------|
| ad loc.    | ad locum (at the place discussed) |              |                                  |
| Akk.       | Akkadian                          | MT           | manuscripts                      |
| ANE        | ancient Near East                 | n./nn.       | Masoretic Text                   |
| Arab.      | Arabic                            | Nab.         | note/notes                       |
| Aram.      | Aramaic                           | N.B.         | Nabatean                         |
| Arm.       | Armenian                          |              | nota bene (note carefully)       |
| Assyr.     | Assyrian                          | n.d.         | no date                          |
| b.         | born                              | NHC          | Nag Hammadi Codex                |
| BCE        | Before Common Era                 | NIV          | New International Version        |
| BHS        | Biblia Hebraica Stuttgartensia    | NJB          | New Jerusalem Bible              |
| ca.        | circa                             | n.p.         | no place; no page                |
| Can.       | Canaanite                         | NRSV         | New Revised Standard Version     |
| CE         | Common Era                        |              |                                  |
| cent.      | century                           | NT           | New Testament                    |
| cf.        | confer (compare)                  | op. cit.     | opera citato (in the work cited) |
| ch./chs.   | chapter/chapters                  | OT           | Old Testament                    |
| col./cols. | column/columns                    | p./pp.       | page/pages                       |
| Copt.      | Coptic                            | pap.         | papyrus                          |
| d.         | died                              | par.         | parallel                         |
| dir./dirs. | director/directors                | Phoen.       | Phoenician                       |
| diss.      | dissertation                      | pl.          | plural; plate                    |
| DN         | divine name                       | PN           | personal name                    |
| DSS        | Dead Sea Scrolls                  | prod./prods. | producer/producers               |
| ed./eds.   | editor/editors                    | pt.          | part                             |
| e.g.       | exempli gratia (for example)      | Pyr.         | Pyramid Texts                    |
| Eg.        | Egyptian                          | Q            | Q [Gospel source]; Qere; Qumran  |
| esp.       | especially                        |              |                                  |
| ET         | English Translation               | r.           | reigned                          |
| et al.     | et alii (and others)              | rec.         | recension                        |
| etc.       | et cetera (and the rest)          | S            | Sūra                             |
| Eth.       | Ethiopic                          | Sam.         | Samaritan                        |
| fig.       | figure                            | sc.          | scene                            |
| fl.        | flourished                        | sg.          | singular                         |
| frg./frgs. | fragment/fragments                | Sum.         | Sumerian                         |
| FS         | Festschrift                       | s.v.         | sub verbo (under the word)       |
| Gk.        | Greek                             | Syr.         | Syriac                           |
| GRA        | Greco-Roman Antiquity             | trans.       | translator                       |
| HB         | Hebrew Bible                      | Ugar.        | Ugaritic                         |
| Heb.       | Hebrew                            | v./vv.       | verse/verses                     |
| Hitt.      | Hittite                           | Vg.          | Vulgate                          |
| ibid.      | ibidem (in the same place)        | v.l.         | varia lectio (variant reading)   |
| id.        | idem (the same)                   | vol./vols.   | volume/volumes                   |
| i.e.       | id est (that is)                  |              |                                  |
| incl.      | inclusive; including              |              |                                  |
| K          | Kethib                            |              |                                  |
| Kh.        | Khirbet                           |              |                                  |
| KJV        | King James Version                |              |                                  |
| km         | kilometer                         |              |                                  |
| Lat.       | Latin                             |              |                                  |
| lit.       | literally                         |              |                                  |
| loc. cit.  | loco citato (in the place cited)  |              |                                  |
| LXX        | Septuagint                        |              |                                  |
| m          | meter; mile                       |              |                                  |
| Mand.      | Mandean/Mandaic                   |              |                                  |
| mm         | millimeters                       |              |                                  |
| MS/MSS     | manuscript/                       |              |                                  |

### 3. Abbreviations of Ancient Sources

#### a) Hebrew Bible/Old Testament

|         |                  |       |                                   |
|---------|------------------|-------|-----------------------------------|
| Gen     | Genesis          | Prov  | Proverbs                          |
| Exod    | Exodus           | Eccl  | Ecclesiastes                      |
| Lev     | Leviticus        | Qoh   | Qoheleth                          |
| Num     | Numbers          | Song  | Song of Solomon (= Song of Songs) |
| Deut    | Deuteronomy      | Cant  | Canticles                         |
| Josh    | Joshua           | Isa   | Isaiah                            |
| Judg    | Judges           | Jer   | Jeremiah                          |
| Ruth    | Ruth             | Lam   | Lamentations                      |
| 1 Sam   | 1 Samuel         | Ezek  | Ezekiel                           |
| 2 Sam   | 2 Samuel         | Dan   | Daniel                            |
| 1 Kgdms | 1 Kingdoms (LXX) | Hos   | Hosea                             |
| 2 Kgdms | 2 Kingdoms (LXX) | Joel  | Joel                              |
| 1 Kgs   | 1 Kings          | Obad  | Obadiah                           |
| 2 Kgs   | 2 Kings          | Jonah | Jonah                             |
| 3 Kgdms | 3 Kingdoms (LXX) | Amos  | Amos                              |
| 4 Kgdms | 4 Kingdoms (LXX) | Mic   | Micah                             |
| 1 Chr   | 1 Chronicles     | Nah   | Nahum                             |
| 2 Chr   | 2 Chronicles     | Hab   | Habakkuk                          |
| Ezra    | Ezra             | Zeph  | Zephaniah                         |
| Neh     | Nehemiah         | Hag   | Haggai                            |
| Esth    | Esther           | Zech  | Zechariah                         |
| Job     | Job              | Mal   | Malachi                           |
| Ps/Pss  | Psalms           |       |                                   |

#### b) New Testament

|         |                 |        |            |
|---------|-----------------|--------|------------|
| Matt    | Matthew         | 1 Tim  | 1 Timothy  |
| Mark    | Mark            | 2 Tim  | 2 Timothy  |
| Luke    | Luke            | Titus  | Titus      |
| John    | John            | Phlm   | Philemon   |
| Acts    | Acts            | Heb    | Hebrews    |
| Rom     | Romans          | Jas    | James      |
| 1 Cor   | 1 Corinthians   | 1 Pet  | 1 Peter    |
| 2 Cor   | 2 Corinthians   | 2 Pet  | 2 Peter    |
| Gal     | Galatians       | 1 John | 1 John     |
| Eph     | Ephesians       | 2 John | 2 John     |
| Phil    | Philippians     | 3 John | 3 John     |
| Col     | Colossians      | Jude   | Jude       |
| 1 Thess | 1 Thessalonians | Rev    | Revelation |
| 2 Thess | 2 Thessalonians |        |            |

#### c) Apocrypha and LXX

|          |                             |        |                                     |
|----------|-----------------------------|--------|-------------------------------------|
| Bar      | Baruch                      | Jdt    | Judith                              |
| Add Dan  | Additions to Daniel         | 1 Macc | 1 Maccabees                         |
| Pr Azar  | Prayer of Azariah           | 2 Macc | 2 Maccabees                         |
| Bel      | Bel and the Dragon          | 3 Macc | 3 Maccabees                         |
| Sg Three | Song of the Three Young Men | 4 Macc | 4 Maccabees                         |
| Sus      | Susanna                     | Pr Man | Prayer of Manasseh                  |
| 1 Esd    | 1 Esdras                    | Ps 151 | Psalms 151                          |
| 2 Esd    | 2 Esdras                    | Sir    | Sirach (= Ecclesiasticus; Ben Sira) |
| Add Esth | Additions to Esther         | Tob    | Tobit                               |
| Ep Jer   | Epistle of Jeremiah         | Wis    | Wisdom of Solomon                   |

*d) Old Testament Pseudepigrapha*

|                                  |                                                                          |                          |                                                          |
|----------------------------------|--------------------------------------------------------------------------|--------------------------|----------------------------------------------------------|
| Ahiqar<br>(Ant. bib.)<br>→L.A.B. | Ahiqar<br>(Antiquitatum biblicarum)<br>→Liber antiquitatum<br>biblicarum | Mart. Ascen. Isa.        | Martyrdom and Ascension of<br>Isaiah                     |
| Apoc. Ab.                        | Apocalypse of Abraham                                                    | Mart. Isa.               | Martyrdom of Isaiah<br>(= Mart. Ascen. Isa. 1–5)         |
| Apoc. Adam                       | Apocalypse of Adam                                                       | Odes Sol.<br>(P.J.)      | Odes of Solomon<br>(Paraleipomena Jeremiou)              |
| Apoc. Dan.                       | Apocalypse of Daniel                                                     | →4 Bar.                  | →4 Baruch                                                |
| Apoc. El. (C)                    | Coptic Apocalypse of Elijah                                              | Ph. E. Poet              | Philo the Epic Poet                                      |
| Apoc. El. (H)                    | Hebrew Apocalypse of Elijah                                              | Pr. Jac.                 | Prayer of Jacob                                          |
| Apoc. Mos.                       | Apocalypse of Moses                                                      | Pr. Jos.                 | Prayer of Joseph                                         |
| Apoc. Sedr.                      | Apocalypse of Sedrach                                                    | Pr. Mos.                 | Prayer of Moses                                          |
| Apoc. Zeph.                      | Apocalypse of Zephaniah                                                  | Ps.-Eup.                 | Pseudo-Eupolemus                                         |
| Apocr. Ezek.                     | Apocryphon of Ezekiel                                                    | Ps.-Hec.                 | Pseudo-Hecataeus                                         |
| Aris. Ex.                        | Aristeas the Exegete                                                     | Ps.-Orph.<br>(Ps.-Philo) | Pseudo-Orpheus<br>(Pseudo-Philo)                         |
| Aristob.                         | Aristobulus                                                              | →L.A.B.                  | →Liber antiquitatum<br>biblicarum                        |
| Artap.                           | Artapanus                                                                | Ps.-Phoc.                | Pseudo-Phocylides                                        |
| As. Mos.                         | Assumption of Moses                                                      | Pss. Sol.                | Psalms of Solomon                                        |
| Ascen. Isa.                      | Ascension of Isaiah<br>(= Mart. Ascen. Isa. 6–11)                        | Ques. Ezra               | Questions of Ezra                                        |
| 2 Bar.                           | 2 Baruch (Syriac Apocalypse)                                             | Rev. Ezra                | Revelation of Ezra                                       |
| 3 Bar.                           | 3 Baruch (Greek Apocalypse)                                              | Sib. Or.                 | Sibylline Oracles                                        |
| 4 Bar.                           | 4 Baruch (Paraleipomena<br>Jeremiou)                                     | Syr. Men.                | Sentences of the Syriac<br>Menander                      |
| (Bib. Ant.)<br>→L.A.B.           | (Antiquitatum biblicarum)<br>→Liber antiquitatum<br>biblicarum           | T. 12 Patr.              | Testaments of the Twelve<br>Patriarchs                   |
| Bk. Noah                         | Book of Noah                                                             | T. Ash.                  | Testament of Asher                                       |
| Cav. Tr.                         | Cave of Treasures                                                        | T. Benj.                 | Testament of Benjamin                                    |
| Cl. Mal.                         | Cleodemus Malchus                                                        | T. Dan.                  | Testament of Dan                                         |
| Dem.                             | Demetrius (the<br>Chronographer)                                         | T. Gad                   | Testament of Gad                                         |
| El. Mod.                         | Eldad and Modad                                                          | T. Iss.                  | Testament of Issachar                                    |
| 1 En.                            | 1 Enoch (Ethiopic Apocalypse)                                            | T. Jos.                  | Testament of Joseph                                      |
| 2 En.                            | 2 Enoch (Slavonic Apocalypse)                                            | T. Jud.                  | Testament of Judah                                       |
| 3 En.                            | 3 Enoch (Hebrew Apocalypse)                                              | T. Levi                  | Testament of Levi                                        |
| Eup.                             | Eupolemus                                                                | T. Naph.                 | Testament of Naphtali                                    |
| Ezek. Trag.                      | Ezekiel the Tragedian                                                    | T. Reu.                  | Testament of Reuben                                      |
| 4 Ezra                           | 4 Ezra                                                                   | T. Sim.                  | Testament of Simeon                                      |
| 5 Apoc. Syr. Pss.                | Five Apocryphal Syriac Psalms                                            | T. Zeb.                  | Testament of Zebulun                                     |
| Gk. Apoc. Ezra                   | Greek Apocalypse of Ezra                                                 | T. 3 Patr.               | Testaments of the Three<br>Patriarchs                    |
| Hec. Ab.                         | Hecataeus of Abdera                                                      | T. Ab.                   | Testament of Abraham                                     |
| Hel. Syn. Pr.                    | Hellenistic Synagogal Prayers                                            | T. Isaac                 | Testament of Isaac                                       |
| Hist. Jos.                       | History of Joseph                                                        | T. Jac.                  | Testament of Jacob                                       |
| Hist. Rech.                      | History of the Rechabites                                                | T. Adam                  | Testament of Adam                                        |
| Jan. Jam.                        | Jannes and Jambres                                                       | T. Hez.                  | Testament of Hezekiah<br>(= Mart. Ascen. Isa. 3:13–4:22) |
| Jos. Asen.                       | Joseph and Aseneth                                                       | T. Job                   | Testament of Job                                         |
| Jub.                             | Jubilees                                                                 | T. Mos.                  | Testament of Moses                                       |
| L.A.B.                           | Liber antiquitatum biblicarum<br>(Pseudo-Philo)                          | T. Sol.                  | Testament of Solomon                                     |
| L.A.E.                           | Life of Adam and Eve                                                     | Theod.                   | Theodotus, On the Jews                                   |
| Lad. Jac.                        | Ladder of Jacob                                                          | Treat. Shem              | Treatise of Shem                                         |
| Let. Aris.                       | Letter of Aristeas                                                       | Vis. Ezra                | Vision of Ezra                                           |
| Liv. Pro.                        | Lives of the Prophets                                                    | (Vis. Isa.)              | (Vision of Isaiah)                                       |
| Lost Tr.                         | The Lost Tribes                                                          | →Ascen. Isa.             | →Ascension of Isaiah                                     |
| 5 Macc.                          | 5 Maccabees (Arabic)                                                     |                          |                                                          |

*e) New Testament Apocrypha and Pseudepigrapha*

|                    |                                                            |                  |                                   |
|--------------------|------------------------------------------------------------|------------------|-----------------------------------|
| Acts Andr.         | Acts of Andrew                                             | Ep. Lao.         | Epistle to the Laodiceans         |
| Acts Andr. Mth.    | Acts of Andrew and Matthias                                | Ep. Lent.        | Epistle of Lentulus               |
| Acts Andr. Paul    | Acts of Andrew and Paul                                    | Ep. Paul Sen.    | Epistles of Paul and Seneca       |
| Acts Barn.         | Acts of Barnabas                                           | Gos. Barn.       | Gospel of Barnabas                |
| Acts Jas.          | Acts of James the Great                                    | Gos. Bart.       | Gospel of Bartholomew             |
| Acts John          | Acts of John                                               | Gos. Bas.        | Gospel of Basilides               |
| Acts John Pro.     | Acts of John (by Prochorus)                                | Gos. Bir. Mary   | Gospel of the Birth of Mary       |
| Acts Paul          | Acts of Paul                                               | Gos. Eb.         | Gospel of the Ebionites           |
| (Acts Perp.)       | (Acts of Perpetua & Felicitas)                             | Gos. Eg.         | Gospel of the Egyptians           |
| →Pass. Perp.       | →Passion of Perpetua and Felicitas                         | Gos. Eve         | Gospel of Eve                     |
| Acts Pet.          | Acts of Peter                                              | Gos. Gam.        | Gospel of Gamaliel                |
| Acts Pet. (Slav.)  | Acts of Peter (Slavonic)                                   | Gos. Heb.        | Gospel of the Hebrews             |
| Acts Pet. Andr.    | Acts of Peter and Andrew                                   | Gos. Jud.        | Gospel of Judas                   |
| Acts Pet. Paul     | Acts of Peter and Paul                                     | Gos. Marcion     | Gospel of Marcion                 |
| Acts Phil.         | Acts of Philip                                             | Gos. Mary        | Gospel of Mary                    |
| Acts Phil. (Syr.)  | Acts of Philip (Syriac)                                    | Gos. Naass.      | Gospel of the Naassenes           |
| Acts Pil.          | Acts of Pilate                                             | Gos. Naz.        | Gospel of the Nazarenes           |
| Acts Thad.         | Acts of Thaddaeus                                          | Gos. Nic.        | Gospel of Nicodemus               |
| Acts Thom.         | Acts of Thomas                                             | Gos. Pet.        | Gospel of Peter                   |
| Apoc. Pet.         | Apocalypse of Peter                                        | (Gos. Ps.-Mt.)   | (Gospel of Pseudo-Matthew)        |
| Ap. John           | Apocryphon of John                                         | →Ps.-Mt.         | →Gospel of Pseudo-Matthew         |
| Apoc. Dosith.      | Apocalypse of Dositheus                                    | Gos. Thom.       | Gospel of Thomas                  |
| Apoc. Messos       | Apocalypse of Messos                                       | Gos. Trad. Mth.  | Gospel and Traditions of Matthias |
| Apoc. Thom.        | Apocalypse of Thomas                                       | Hist. Jos. Carp. | History of Joseph the Carpenter   |
| Apoc. Vir.         | Apocalypse of the Virgin                                   | Hymn Dance       | Hymn of the Dance                 |
| (Apocr.) Ep. Tit.  | Apocryphal Epistle of Titus                                | Hymn Pearl       | Hymn of the Pearl                 |
| (Apocr.) Gos. John | Apocryphal Gospel of John                                  | Inf. Gos. Thom.  | Infancy Gospel of Thomas          |
| Apos. Con.         | Apostolic Constitutions and Canons                         | Inf. Gos.        | Infancy Gospels                   |
| Ps.-Abd.           | Apostolic History of Pseudo-Abdias                         | Mart. Bart.      | Martyrdom of Bartholomew          |
| (Arab.) Gos. Inf.  | Arabic Gospel of the Infancy                               | Mart. Mt.        | Martyrdom of Matthew              |
| (Arm.) Gos. Inf.   | Armenian Gospel of the Infancy                             | Mart. Paul       | Martyrdom of Paul                 |
| Asc. Jas.          | Ascents of James                                           | Mart. Pet.       | Martyrdom of Peter                |
| Assum. Vir.        | Assumption of the Virgin                                   | Mart. Pet. Paul  | Martyrdom of Peter and Paul       |
| Bk. Barn.          | Book of the Resurrection of Christ by Barnabas the Apostle | Mart. Phil.      | Martyrdom of Philip               |
| Bk. Elch.          | Book Elchasai                                              | Melkon           | Melkon                            |
| Cerinthus          | Cerinthus                                                  | Mem. Apos.       | Memoria of Apostles               |
| 3 Cor.             | 3 Corinthians                                              | Pass. Perp.      | Passion of Perpetua and Felicitas |
| Ep. Alex.          | Epistle to the Alexandrians                                | Pre. Pet.        | Preaching of Peter                |
| Ep. Apos.          | Epistle to the Apostles                                    | Prot. Jas.       | Protevangelium of James           |
| Ep. Chr. Abg.      | Epistle of Christ and Abgar                                | Ps.-Clem.        | Pseudo-Clementines                |
| Ep. Chr. Heav.     | Epistle of Christ from Heaven                              | Ps.-Mt.          | Gospel of Pseudo-Matthew          |
|                    |                                                            | Rev. Steph.      | Revelation of Stephen             |
|                    |                                                            | Sec. Gos. Mk.    | Secret Gospel of Mark             |
|                    |                                                            | Vis. Paul        | Vision of Paul                    |

*f) Apostolic Fathers*

|             |                                   |             |                                  |
|-------------|-----------------------------------|-------------|----------------------------------|
| Barn.       | Barnabas                          | Ign. Magn.  | Ignatius, To the Magnesians Ign. |
| 1 Clem.     | 1 Clement                         | Phld.       | Ignatius, To the Philadelphians  |
| 2 Clem.     | 2 Clement                         | Ign. Pol.   | Ignatius, To Polycarp            |
| Did.        | Didache                           | Ign. Rom.   | Ignatius, To the Romans          |
| Diogn.      | Diognetus                         | Ign. Smyrn. | Ignatius, To the Smyrnaeans      |
| Herm. Mand. | Shepherd of Hermas, Mandate(s)    | Ign. Trall. | Ignatius, To the Trallians       |
| Herm. Sim.  | Shepherd of Hermas, Similitude(s) | Mart. Pol.  | Martyrdom of Polycarp            |
| Herm. Vis.  | Shepherd of Hermas, Vision(s)     |             |                                  |
| Ign. Eph.   | Ignatius, To the Ephesians        |             |                                  |

*g) Rabbinic Works*

**i. Mishnah, Talmud, and Related Literature**

a. Major Works

|   |                   |                     |
|---|-------------------|---------------------|
| b | Talmud Bavli      | (Babylonian Talmud) |
| m | Mishnah           | (Mishnah)           |
| t | Tosefta           | (Tosefta)           |
| y | Talmud Yerushalmi | (Jerusalem Talmud)  |

\* Combined with the tractate abbreviations below (e.g., bBer, tShab)

b. Individual Tractates

|      |               |           |               |
|------|---------------|-----------|---------------|
| Ar   | ‘Arakhin      | Ned       | Nedarim       |
| Av   | Avot          | Neg       | Nega‘im       |
| AZ   | ‘Avodah Zarah | Nid       | Niddah        |
| BB   | Bava Batra    | Ohal      | Ohalot        |
| Bekh | Bekhorot      | Orl       | ‘Orlah        |
| Ber  | Berakhot      | Par       | Parah         |
| Bets | Betsah        | Pea       | Pe‘ah         |
| Bik  | Bikkurim      | Pes       | Pesaḥim       |
| BM   | Bava Metsi‘a  | Qid       | Qiddushin     |
| BQ   | Bava Qamma    | Qin       | Qinnim        |
| Dem  | Demai         | RH        | Rosh Hashanah |
| Ed   | ‘Eduyot       | San       | Sanhedrin     |
| Er   | ‘Eruvin       | Shab      | Shabbat       |
| Git  | Gittin        | Sheq      | Sheqalim      |
| Hag  | Ḥagigah       | Shevi     | Shevi‘it      |
| Hal  | Ḥallah        | Shevu     | Shevu‘ot      |
| Hor  | Horayot       | Sot       | Sotah         |
| Hul  | Ḥullin        | Suk       | Sukkah        |
| Kel  | Kelim         | Taan      | Ta‘anit       |
| Ker  | Keritot       | Tam       | Tamid         |
| Ket  | Ketubbot      | Tem       | Temurah       |
| Kil  | Kil‘ayim      | Ter       | Terumah       |
| Maas | Ma‘aśrot      | TevY      | Tevul Yom     |
| Mak  | Makkot        | Toh       | Tohorot       |
| Makh | Makhshirin    | Uq        | ‘Uqtsin       |
| Meg  | Megillah      | Yad       | Yadayim       |
| Meil | Me‘ilah       | Yev       | Yevamot       |
| Men  | Menahot       | Yom       | Yoma          |
| Mid  | Middot        | (Yom Tov) | (Yom Tov)     |
| Miq  | Miqwa‘ot      | →Bets     | →Betsah       |
| MQ   | Mo‘ed Qatan   | Zav       | Zavim         |
| MSH  | Ma‘aśer Sheni | Zev       | Zevaḥim       |
| Naz  | Nazir         |           |               |

## ii. Midrashim, Targumim, and Collections

|           |                                               |              |                                                  |
|-----------|-----------------------------------------------|--------------|--------------------------------------------------|
| AgAg      | Agudat Aggadot: qovets midrashim qetanim      | (MidShT)     | (Midrash Shoḥer Tov)                             |
| AgBer     | Aggadot Bereshit                              | →MidTeh      | →Midrash Tehillim (Shoḥer Tov)                   |
| AgEst     | Aggadot Ester                                 | →MidMish     | →Midrash Mishlei (Shoḥer Tov)                    |
| AgShir    | Aggadot Shir ha-Shirim                        | MidTan       | Midrash Tanna'im (Mekhilta le-sefer Devarim)     |
| ARN       | Avot de-Rabbi Natan                           | MidTeh       | Midrash Tehillim (Shoḥer Tov)                    |
| BatM      | Batei Midrashot (ed. Wertheimer)              | (MidZut)     | (Midrash Zuta)                                   |
| BemR      | Bemidbar Rabbah                               | →EkhZ        | →Ekhah Zuta                                      |
| BerR      | Bereshit Rabbah                               | →QohZ        | →Qohelet Zuta                                    |
| BerRbti   | Bereshit Rabbati                              | →RutZ        | →Rut Zuta                                        |
| BerZ      | Bereshit Zuta                                 | →ShirZ       | →Shir ha-Shirim Zuta                             |
| BHM       | Bet ha-Midrash (ed. Jellinek)                 | (NumR)       | (Numbers Rabbah)                                 |
| CN        | Codex Neofiti                                 | →BemR        | →Bemidbar Rabbah                                 |
| DER       | Derekh Erets Rabbah                           | OtsMid       | Otsar Midrashim (ed. Eisenstein)                 |
| (DeutR)   | (Deuteronomy Rabbah)                          | PesRK        | Pesiqta de-Rav Kahana                            |
| →DevR     | →Devarim Rabbah                               | PesRab       | Pesiqta Rabbati                                  |
| DevR      | Devarim Rabbah                                | (PesZut)     | (Pesiqta Zutarta)                                |
| DEZ       | Derekh Erets Zuta                             | →LeqT        | →Leqaḥ Tov                                       |
| (EcclR)   | (Ecclesiastes Rabbah)                         | PRE          | Pirquei de-Rabbi Eli'ezer                        |
| →QohR     | →Qohelet Rabbah                               | QohR         | Qohelet Rabbah                                   |
| EkhR      | Ekhah Rabbah                                  | QohZ         | Qohelet Zuta                                     |
| EkhZ      | Ekhah Zuta                                    | RutR         | Rut Rabbah                                       |
| EstR      | Ester Rabbah                                  | RutZ         | Rut Zuta                                         |
| (EvelRab) | (Evel Rabbati)                                | SAME         | Sifrei de-Aggadta 'al Megillat Ester (ed. Buber) |
| →Sem      | →Semaḥot (Evel Rabbati)                       | SekhT        | Sekhel Tov                                       |
| (ExR)     | (Exodus Rabbah)                               | Sem          | Semaḥot (Evel Rabbati)                           |
| →ShemR    | →Shemot Rabbah                                | SER          | Seder Eliyahu Rabbah                             |
| (GenR)    | (Genesis Rabbah)                              | SEZ          | Seder Eliyahu Zuta                               |
| →BerR     | →Bereshit Rabbah                              | ShemR        | Shemot Rabbah                                    |
| Kallah    | Kallah                                        | ShirR        | Shir ha-Shirim Rabbah                            |
| (LamR)    | (Lamentations Rabbah)                         | ShirZ        | Shir ha-Shirim Zuta                              |
| →EkhR     | →Ekhah Rabbah                                 | (Shoher Tov) | (Shoḥer Tov)                                     |
| LeqT      | Leqaḥ Tov                                     | →MidTeh      | →Midrash Tehillim (Shoḥer Tov)                   |
| (LevR)    | (Leviticus Rabbah)                            | →MidMish     | →Midrash Mishlei (Shoḥer Tov)                    |
| →WayR     | →Wayiqra Rabbah                               | SifBem       | Sifrei Bemidbar                                  |
| MegTa     | Megillat Ta'anit                              | SifDev       | Sifrei Devarim                                   |
| MekhSh    | Mekhilta de-Rabbi Shim'on ben Yoḥai           | Sifra        | Sifra                                            |
| MekhY     | Mekhilta de-Rabbi Yishma'el                   | SifZ         | Sifrei Zuta                                      |
| MHGBem    | Midrash ha-Gadol Bemidbar                     | Sof          | Soferim                                          |
| MHGBer    | Midrash ha-Gadol Bereshit                     | SOR          | Seder 'Olam Rabbah                               |
| MHGDev    | Midrash ha-Gadol Devarim                      | SOZ          | Seder 'Olam Zuta                                 |
| MHGShem   | Midrash ha-Gadol Shemot                       | (SongR)      | (Song of Songs Rabbah)                           |
| MHGWay    | Midrash ha-Gadol Wayiqra                      | →ShirR       | →Shir ha-Shirim Rabbah                           |
| MidAg     | Midrash Aggadah Buber                         | Tan          | Tanḥuma                                          |
| MidMish   | Midrash Mishlei (Shoḥer Tov)                  | TanB         | Tanḥuma Buber                                    |
| MidRab    | Midrash Rabbah<br>(see also individual books) | (TannaEli)   | (Tanna de-vei Eliyahu)                           |
| MidShem   | Midrash Shemu'el                              | →SER         | →Seder Eliyahu Rabbah                            |
| MidShir   | Midrash Shir ha-Shirim (Grünhut)              | →SEZ         | →Seder Eliyahu Zuta                              |
|           |                                               | TFrag        | Targum Fragmentary                               |

|        |                         |          |                        |
|--------|-------------------------|----------|------------------------|
| (TJI)  | (Targum Yerushalmi I)   | TPsJ     | Targum Pseudo-Jonathan |
| →TPsJ  | →Targum Pseudo-Jonathan |          |                        |
| (TJII) | (Targum Yerushalmi II)  | TPss     | Targum Psalms          |
| →TFrag | →Targum Fragmentary     | TSong    | Targum Song of Songs   |
| TJon   | Targum Jonathan         | WayR     | Wayiqra Rabbah         |
| TNeof  | Targum Neofiti          | YalqShim | Yalqut Shim'oni        |
| TO     | Targum Onqelos          | YalqMa   | Yalqut ha-Makhiri      |

### iii. Other Medieval Works

- |                     |                                    |
|---------------------|------------------------------------|
| • Karo, ShA         | Joseph Karo, Shulḥan ‘Arukh        |
| • Maimonides, Guide | Maimonides, Guide of the Perplexed |
| • Maimonides, MishT | Maimonides, Mishneh Torah          |
| • Saadia, BO        | Saadia, Beliefs and Opinions       |

### iv. Sections of Shulḥan ‘Arukh and Arba‘ah Turim

- |      |                |
|------|----------------|
| • OH | Oraḥ Ḥayim     |
| • EH | Even ha-‘Ezer  |
| • HM | Ḥoshen Mishpat |
| • YD | Yoreh De‘ah    |

#### *h) Other Ancient Sources*

See P. H. Alexander et al. (eds.). *The SBL Handbook of Style* (SBL: Peabody, Mass., 1999) §8.3.5 and appendix F for:

- Dead Sea Scrolls and related texts
- Philo and Josephus
- Nag Hammadi Codices
- Greek and Latin works

## 4. Abbreviations of Secondary Sources

For abbreviations of secondary sources (such as journals, periodicals, reference works, and series), please refer to:

- P. H. Alexander et al. (eds.). *The SBL Handbook of Style* (SBL: Peabody, Mass., 1999) §8.4. [SBL.HS]
- S. M. Schwertner. *Internationales Abkürzungsverzeichnis für Theologie und Grenzgebiete* (Walter de Gruyter: Berlin/New York, 1992): 3–139. [IATG]

## E. JBR SPELLINGS AND CAPITALIZATIONS

### 1. Basic Rules

- Spelling of biblical names should follow the New Revised Standard Version (NRSV)
- Spelling of non-biblical names should follow “common usage” (check with editors) and/or “Merriam-Webster” online dictionary ([www.merriam-webster.com/dictionary](http://www.merriam-webster.com/dictionary))
- Arabic names with “al-” should retain this in their short form (e.g., always “al-Tabari”, not “Tabari”)
- Genitive of words ending in “s” have apostrophe only (e.g., “Abraham’s horse” but “Amos’ horse”)
- Note the use and absence of hyphens (e.g., “in the 17th century” but “in the 17th-century texts”)

## 2. Some Common Spellings and “In-Text” Capitalizations

|                                                           |                                          |
|-----------------------------------------------------------|------------------------------------------|
| aggadah (except for Passover haggadah)                    | [not: haggadah; agadah]                  |
| aggadic                                                   | [not: haggadic; agadic]                  |
| ‘am ha-arets                                              | [not: am haarez; ‘am ha-arets]           |
| amphitheater                                              | [not: amphitheatre]                      |
| ancient Near East                                         | [not: Ancient Near East]                 |
| ancient Near Eastern                                      | [not: Ancient Near Eastern]              |
| Antichrist, the                                           | [not: antichrist, the]                   |
| antiquity                                                 | [not: Antiquity]                         |
| antisemitic                                               | [not: anti-Semitic; anti-semitic]        |
| antisemitism                                              | [not: anti-Semitism; anti-semitism]      |
| Apocrypha, the                                            | [not: apocrypha, the]                    |
| apocryphal                                                | [not: Apocryphal]                        |
| apostle(s), the                                           | [not: Apostle(s), the]                   |
| Aqedah                                                    | [not: Akedah; aqedah]                    |
| archaeology                                               | [not: archeology]                        |
| Aramaean                                                  | [not: Aramean]                           |
| ark (Noah’s)                                              | [not: Ark]                               |
| ark of the covenant                                       | [not: Ark of the Covenant]               |
| bar/bat mitzvah                                           | [not: bar/bat mitzvah; mitzwah; mitzwah] |
| Baroque                                                   | [not: baroque]                           |
| beatitudes (general)                                      | [not: Beatitudes]                        |
| Beatitudes, the (NT sayings)                              | [not: beatitudes, the]                   |
| Bible                                                     | [not: bible]                             |
| biblical                                                  | [not: Biblical]                          |
| biblicist                                                 | [not: Biblicist]                         |
| catalogue                                                 | [not: catalog]                           |
| center                                                    | [not: centre]                            |
| Christology                                               | [not: christology]                       |
| christological                                            | [not: Christological]                    |
| commandment (first, second, etc.; but “Ten Commandments”) | [not: Creation, the]                     |
| creation, the                                             | [not: creator, the]                      |
| Creator, the                                              | [not: Crusader]                          |
| crusader                                                  | [not: crusades]                          |
| Crusades                                                  | [not: davidic]                           |
| Davidic                                                   | [not: day of atonement]                  |
| Day of Atonement                                          | [not: Day of Judgment; day of judgement] |
| day of judgment                                           | [not: Day of Pentecost]                  |
| day of Pentecost                                          | [not: day of the Lord]                   |
| Day of the Lord                                           | [not: Deity]                             |
| deity                                                     | [not: Deuterocanonical]                  |
| deuterocanonical                                          | [not: deuteronomic]                      |
| Deuteronomic                                              | [not: diaspora]                          |
| Diaspora                                                  | [not: Divine]                            |
| divine                                                    | [not: divine warrior]                    |
| Divine Warrior                                            | [not: Early Antiquity]                   |
| early antiquity                                           |                                          |

|                                                                          |                                                 |
|--------------------------------------------------------------------------|-------------------------------------------------|
| early church                                                             | [not: Early Church]                             |
| emperor, the                                                             | [not: Emperor, the]                             |
| Emperor Nero (but “the emperor Nero”)                                    |                                                 |
| empire, the                                                              | [not: Empire, the]                              |
| Empire, Roman/Assyrian etc.                                              | [not: empire, Roman/Assyrian etc.]              |
| Epistle to the Romans (etc.)                                             |                                                 |
| Erets Israel                                                             | [not: Eretz Israel; erets Israel; eretz Israel] |
| Eucharist                                                                | [not: eucharist]                                |
| eucharistic                                                              | [not: Eucharistic]                              |
| exile, the                                                               | [not: Exile, the]                               |
| exodus, the                                                              | [not: Exodus, the]                              |
| flood, the                                                               | [not: Flood, the]                               |
| footwashing                                                              | [not: foot-washing]                             |
| garden of Eden                                                           | [not: Garden of Eden]                           |
| genizah, a (but “Cairo Genizah”)                                         | [not: geniza]                                   |
| Gentile(s) (noun and adj.)                                               | [not: gentile(s)]                               |
| gnostic                                                                  | [not: Gnostic]                                  |
| Gnosticism                                                               | [not: gnosticism]                               |
| golden calf, the                                                         | [not: Golden Calf, the]                         |
| gospel                                                                   | [not: Gospel]                                   |
| Gospel of [title] (but “Mark’s gospel”)                                  |                                                 |
| gospels (generically)                                                    |                                                 |
| Gospels, the (division of the canon)                                     |                                                 |
| Greco-Roman                                                              | [not: Graeco-Roman; greco-roman]                |
| Ḥadīth                                                                   | [not: ḥadīth; hadith; Hadith]                   |
| haggadah (only for the Passover liturgical text; otherwise use: aggadah) |                                                 |
| halakhah                                                                 | [not: halakah; halakha; halacha]                |
| halakhic                                                                 | [not: halakic; halachic]                        |
| halakhist                                                                | [not: halakist; halachist]                      |
| Hanukkah                                                                 | [not: Chanukkah; Chanukah]                      |
| Hasidic                                                                  | [not: hasidic]                                  |
| Hasmonean                                                                | [not: Hasmonaeon]                               |
| he / him / his (God)                                                     | [not: He / Him / His]                           |
| heaven                                                                   | [not: Heaven]                                   |
| Hellenism                                                                | [not: hellenism]                                |
| Hellenistic                                                              | [not: hellenistic]                              |
| hellenize                                                                | [not: Hellenize]                                |
| high priest                                                              | [not: High Priest]                              |
| holy of holies                                                           | [not: Holy of Holies]                           |
| house of David                                                           | [not: House of David]                           |
| intertestamental                                                         | [not: Intertestamental; inter-testamental]      |
| Islamic                                                                  | [not: islamic]                                  |
| Jordan River, the (but “the river Jordan”)                               |                                                 |
| Judea                                                                    | [not: Judaea]                                   |
| Judean                                                                   | [not: Judaeon]                                  |
| judgment                                                                 | [not: judgement]                                |
| Kabbalah                                                                 | [not: kabbalah]                                 |
| kabbalist / kabbalistic                                                  | [not: Kabbalist / Kabbalistic]                  |
| king, the                                                                | [not: King, the]                                |
| King David (but “the king David”)                                        |                                                 |
| kingdom of God / heaven                                                  | [not: Kingdom of God / Heaven]                  |

|                                                     |                               |                                             |
|-----------------------------------------------------|-------------------------------|---------------------------------------------|
| last days                                           |                               | [not: Last Days]                            |
| Last Judgment                                       |                               | [not: last judgment; Last Judgement]        |
| late antiquity                                      |                               | [not: Late Antiquity]                       |
| Latter-day Saints                                   |                               | [not: Latter-Day Saints; Latter day Saints] |
| law                                                 | (generically)                 |                                             |
| Law, the                                            | (division of the canon)       |                                             |
| Letter to the Romans (etc.)                         |                               |                                             |
| Levitical                                           |                               | [not: levitical]                            |
| Maccabean                                           |                               | [not: Maccabaeon]                           |
| Maccabeus, Judas                                    |                               | [not: Maccabee/Maccabaeus, Judas/Judah]     |
| Masorah                                             |                               | [not: masorah]                              |
| Masoretes                                           |                               | [not: masoretes]                            |
| masoretic                                           |                               | [not: Masoretic]                            |
| Masoretic Text                                      |                               | [not: masoretic text]                       |
| Mecca                                               | (technical usage = Makka)     |                                             |
| medieval                                            |                               | [not: Medieval; mediaeval]                  |
| Medina                                              | (technical usage = Madina)    |                                             |
| messiah                                             | (in general)                  | [not: Messiah]                              |
| Messiah, the                                        | (specific)                    | [not: messiah]                              |
| messiahship                                         |                               | [not: Messiahship]                          |
| messianic                                           |                               | [not: Messianic]                            |
| Middle Ages                                         |                               | [not: middle ages]                          |
| midrash                                             | (in general)                  | [not: Midrash]                              |
| Midrash                                             | (part of the title of a work) | [not: midrash]                              |
| midrashic                                           |                               | [not: Midrashic]                            |
| midrashim                                           |                               | [not: Midrashim]                            |
| miqva'ot                                            |                               | [not: mikva'ot; mikvaot; miqvaot]           |
| miqveh                                              |                               | [not: mikveh; miqweh; mikweh]               |
| Mishnah                                             |                               | [not: mishnah]                              |
| mishnaic                                            |                               | [not: Mishnaic]                             |
| Muḥammad                                            |                               | [not: Muhammad; Mohammed]                   |
| Muslim                                              |                               | [not: Moslem]                               |
| Negev                                               |                               | [not: Negeb]                                |
| Neo-Assyrian period (but "Neo-Assyrian Empire")     |                               |                                             |
| Neo-Babylonian period (but "Neo-Babylonian Empire") |                               |                                             |
| neoplatonic                                         |                               | [not: Neoplatonic; neo-platonic]            |
| neoplatonism                                        |                               | [not: Neoplatonism; neo-platonism]          |
| neoplatonist                                        |                               | [not: Neoplatonist; neo-platonist]          |
| northern Israel                                     |                               | [not: Northern Israel]                      |
| northern kingdom                                    |                               | [not: Northern Kingdom]                     |
| Northwest Semitic                                   |                               | [not: northwest Semitic]                    |
| paleography                                         |                               | [not: palaeography]                         |
| patriarchal                                         |                               | [not: Patriarchal]                          |
| patriarchs, the                                     |                               | [not: Patriarchs, the]                      |
| patristic(s)                                        |                               | [not: Patristic(s)]                         |
| Pax Romana                                          |                               | [not: pax Romana]                           |
| Pentateuch                                          |                               | [not: pentateuch]                           |
| pentateuchal                                        |                               | [not: Pentateuchal]                         |
| pharaoh, the                                        |                               | [not: Pharaoh, the]                         |
| Pharaoh                                             | (as proper name)              |                                             |
| Pharisaic                                           |                               | [not: pharisaic]                            |

|                           |                             |                                                   |
|---------------------------|-----------------------------|---------------------------------------------------|
| pope, the                 |                             | [not: Pope, the]                                  |
| Pope John XXIII           | (but “the pope John XXIII”) |                                                   |
| postbiblical              |                             | [not: Postbiblical; post-biblical]                |
| postexilic                |                             | [not: Postexilic; post-exilic]                    |
| post-Nicene               |                             | [not: Post-Nicene; postnicene; Postnicene]        |
| potsherd                  |                             | [not: potshard]                                   |
| preexilic                 |                             | [not: Preexilic; pre-exilic]                      |
| priesthood                |                             | [not: Priesthood]                                 |
| Priestly Code/Document    |                             | [not: priestly code/document; Priestly code/etc.] |
| Priestly source           |                             | [not: priestly source; Priestly Source]           |
| priestly writings         |                             | [not: Priestly Writings; Priestly writings]       |
| promised land             |                             | [not: Promised Land]                              |
| prophets                  | (generically)               |                                                   |
| Prophets, the             | (division of the canon)     |                                                   |
| pseudepigrapha            | (generically)               |                                                   |
| Pseudepigrapha, the       | (body of literature)        |                                                   |
| pseudepigraphic           |                             | [not: Pseudepigraphic]                            |
| Qur’ān                    |                             | [not: Qur’an; Qur’an; Qur’ān; Koran]              |
| qur’ānic                  |                             | [not: qur’anic; qur’anic; Qur’anic; Koranic]      |
| rabbi(s)                  |                             | [not: Rabbi(s)]                                   |
| rabbinic                  |                             | [not: Rabbinic]                                   |
| Renaissance               |                             | [not: renaissance]                                |
| river Jordan,             | (but “the Jordan River”)    |                                                   |
| the                       |                             | [not: Sa’adiah Gaon]                              |
| Sabbath, the              |                             | [not: sabbath, the]                               |
| Scripture                 | (Bible as canon)            | [not: scripture]                                  |
| scriptural                |                             | [not: Scriptural]                                 |
| Second Temple period      |                             | [not: second temple period]                       |
| Septuagint                |                             | [not: septuagint]                                 |
| Sermon on the Mount/Plain |                             | [not: sermon on the mount/plain]                  |
| Son of God                | (title)                     | [not: son of God]                                 |
| sons of God               | (general)                   | [not: Sons of God]                                |
| Son of Man                |                             | [not: son of man]                                 |
| southern kingdom          |                             | [not: Southern Kingdom]                           |
| Spirit, the               |                             | [not: spirit, the]                                |
| spirit of God             |                             | [not: Spirit of God]                              |
| sūra                      |                             | [not: sura; Sūra; Sura]                           |
| synoptic                  | (adjective)                 | [not: Synoptic]                                   |
| Synoptic Gospels, the     |                             | [not: synoptic gospels, the]                      |
| Synoptic Problem, the     |                             | [not: synoptic problem, the]                      |
| Synoptics, the            |                             | [not: synoptics, the]                             |
| tabernacle                |                             | [not: Tabernacle]                                 |
| Talmud                    |                             | [not: talmud]                                     |
| talmudic                  |                             | [not: Talmudic]                                   |
| talmudist                 |                             | [not: Talmudist]                                  |
| Tanakh                    |                             | [not: Tanak]                                      |
| Targum                    |                             | [not: targum]                                     |
| targumic                  |                             | [not: Targumic]                                   |
| targumist                 |                             | [not: Targumist]                                  |
| temple, the               | (Solomon’s temple, etc.)    | [not: Temple, the]                                |
| Temple Mount              |                             | [not: temple mount]                               |

|                                       |                                             |
|---------------------------------------|---------------------------------------------|
| Ten Commandments                      | [not: ten commandments]                     |
| tent of meeting                       | [not: Tent of Meeting]                      |
| testament (generically)               | [not: Testament]                            |
| Testaments, both (HB/OT and NT)       | [not: testaments, both]                     |
| theater                               | [not: theatre]                              |
| Tiglath-pileser                       | [not: Tiglath-Pileser]                      |
| torah (generically)                   |                                             |
| Torah, the (division of the canon)    |                                             |
| tosafist                              | [not: Tosafist]                             |
| Tosefta                               | [not: tosefta]                              |
| tower of Babel                        | [not: Tower of Babel]                       |
| transfiguration, the                  | [not: Transfiguration, the]                 |
| Twelve, the (apostles)                | [not: twelve, the]                          |
| twelve apostles                       | [not: Twelve Apostles]                      |
| twelve tribes                         | [not: Twelve Tribes]                        |
| unchristian                           | [not: Unchristian]                          |
| underworld (adj.)                     | [not: Underworld]                           |
| Underworld, the                       | [not: underworld, the]                      |
| united kingdom (Israel and Judah)     | [not: United Kingdom]                       |
| united                                | [not: United Monarchy]                      |
| Upper Egypt                           | [not: upper Egypt]                          |
| upper Galilee                         | [not: Upper Galilee]                        |
| Urim and Thummim                      | [not: urim and thummim]                     |
| virgin (general)                      | [not: Virgin]                               |
| Virgin, the (Mary)                    | [not: virgin, the]                          |
| virgin birth, the                     | [not: Virgin Birth; Virgin birth]           |
| vis-à-vis                             | [not: vis-a-vis]                            |
| West Semitic                          | [not: west Semitic]                         |
| Western church                        | [not: western church]                       |
| Western text                          | [not: western text]                         |
| wisdom (movement, quality)            | [not: Wisdom]                               |
| Wisdom (personified)                  | [not: wisdom]                               |
| Wisdom literature                     | [not: wisdom literature; Wisdom Literature] |
| wisdom tradition                      | [not: Wisdom tradition]                     |
| wise men                              | [not: Wise Men]                             |
| Word, the (= Jesus)                   | [not: word, the]                            |
| word of God                           | [not: Word of God]                          |
| worship / worshipper / worshipping    | [not: worshiper / worshipping]              |
| Writings, the (division of the canon) |                                             |
| Yahwist                               | [not: Jahwist]                              |
| yeshivah                              | [not: yeshiva]                              |
| YHWH (or Yahweh)                      | [not: Jahweh]                               |
| Yom Kippur (Day of Atonement)         |                                             |
| Zealots, the                          | [not: zealots]                              |

- Further examples can be found in the *SBL Handbook of Style* (Appendix A [154–65]), though note that differences exist between JBR and SBL spellings. The JBR spellings here take precedence over those in SBL-HS.

### 13. Questions?

Feel free to contact us with any questions:

De Gruyter  
Genthiner Str. 13  
10785 Berlin  
Germany

Phone: +49-30-26005-195

Email: [Albrecht.Doehnert@degruyter.com](mailto:Albrecht.Doehnert@degruyter.com)
